# Supplementary material for: Exploring the evolutionary characteristics between cultivated tea and its wild relatives using complete chloroplast genomes
Source: Research Square preprint supplement (doi:10.21203/rs.3.rs-15441/v3), 2020-10-15
Supplement: Supplementary file 1 [file 353912b41e66b3cbcb47084b.xlsx]

## Sheet: KaKs
Table S5. Nonsynonymous nucleotide substitution (Ka) and synonymous nucleotide substitution (Ks) rates, as well as the Ka/Ks ratio of homologous protein-coding genes from C. sinensis var. assamica and C. sinensis var. sinensis assamica cv. Yunkang10
Locations	Names	Ka	Ks	Ka/Ks
LSC	psbA	0	0	0
LSC	matK	0	0	0
LSC	rps16	0	0	0
LSC	psbK	0	0	0
LSC	psbI	0	0	0
LSC	atpA	0	0	0
LSC	atpF	0	0	0
LSC	atpH	0	0	0
LSC	atpI	0	0	0
LSC	rps2	0	0	0
LSC	rpoC2	0	0	0
LSC	rpoC1	0	0	0
LSC	rpoB	0	0	0
LSC	petN	0	0	0
LSC	psbM	0	0	0
LSC	psbD	0	0	0
LSC	psbC	0	0	0
LSC	psbZ	0	0	0
LSC	rps14	0	0	0
LSC	psaB	0	0	0
LSC	psaA	0	0	0
LSC	ycf3	0	0	0
LSC	rps4	0	0	0
LSC	ndhJ	0	0	0
LSC	ndhK	0	0	0
LSC	ndhC	0	0	0
LSC	atpE	0	0	0
LSC	atpB	0	0	0
LSC	rbcL	0	0	0
LSC	accD	0	0	0
LSC	psaI	0	0	0
LSC	ycf4	0	0	0
LSC	cemA	0	0	0
LSC	petA	0	0	0
LSC	psbJ	0	0	0
LSC	psbL	0	0	0
LSC	psbF	0	0	0
LSC	psbE	0	0	0
LSC	petL	0	0	0
LSC	petG	0	0	0
LSC	psaJ	0	0	0
LSC	rpl33	0	0	0
LSC	rps18	0	0	0
LSC	rpl20	0	0	0
LSC	rps12	0	0	0
LSC	clpP	0	0	0
LSC	psbB	0	0	0
LSC	psbT	0	0	0
LSC	psbN	0	0	0
LSC	psbH	0	0	0
LSC	petB	0	0	0
LSC	petD	0	0	0
LSC	rpoA	0	0	0
LSC	rps11	0	0	0
LSC	rpl36	0	0	0
LSC	infA	0	0	0
LSC	rps8	0	0	0
LSC	rpl14	0	0	0
LSC	rpl16	0	0	0
LSC	rps3	0	0	0
LSC	rpl22	0	0	0
LSC	rps19	0	0	0
IR	rpl2	0	0	0
IR	rpl23	0	0	0
IR	ycf2	0	0	0
IR	ndhB	0	0	0
IR	rps7	0	0	0
IR	ycf1	0	0	0
SSC	ndhF	0	0	0
SSC	rpl32	0	0	0
SSC	ccsA	0	0	0
SSC	ndhD	0	0	0
SSC	psaC	0	0	0
SSC	ndhE	0	0	0
SSC	ndhG	0	0	0
SSC	ndhI	0	0	0
SSC	ndhA	0	0	0
SSC	ndhH	0	0	0
SSC	rps15	0	0	0
