# Supplementary material for: Exploring the evolutionary characteristics between cultivated tea and its wild relatives using complete chloroplast genomes
Source: Research Square preprint supplement (doi:10.21203/rs.3.rs-15441/v3), 2020-10-15
Supplement: Supplementary file 2 [file 6122b758d917191cad6e8ea6.xlsx]

## Sheet: Pi
Table S1. Comparative analysis of nucleotide variability (Pi) values among the Chinese cultivated type, Assam cultivated type and wild type
				Chinese cultivated type		Assam cultivated type		Wild type
Regions	Types	NO.	Names	Pi	Length	Pi	Length	Pi	Length
LSC	CDS	1	psbA	0	1062	0	1062	0.00054	1062
LSC	CDS	2	matK	0.00089	1500	0	1500	0.00259	1500
LSC	CDS	3	rps16	0.0025	267	0	267	0.00108	267
LSC	CDS	4	psbK	0	186	0	186	0.00154	186
LSC	CDS	5	psbI	0	111	0	111	0	156
LSC	CDS	6	atpA	0	1524	0	1524	0.00089	1524
LSC	CDS	7	atpF	0	555	0	555	0.00178	555
LSC	CDS	8	atpH	0	246	0	246	0	246
LSC	CDS	9	atpI	0	744	0	744	0.00068	744
LSC	CDS	10	rps2	0	711	0	711	0.0015	711
LSC	CDS	11	rpoC2	0.00049	4125	0	4137	0.00111	4137
LSC	CDS	12	rpoC1	0	2052	0	2070	0.00133	2082
LSC	CDS	13	rpoB	0.00041	3213	0	3213	0.00095	3213
LSC	CDS	14	petN	0	90	0	132	0	90
LSC	CDS	15	psbM	0	105	0	105	0.00251	105
LSC	CDS	16	psbD	0	1062	0	1062	0.00031	1062
LSC	CDS	17	psbC	0.00047	1422	0	1422	0.00118	1422
LSC	CDS	18	psbZ	0	189	0	189	0.00076	189
LSC	CDS	19	rps14	0	303	0	303	0	303
LSC	CDS	20	psaB	0	2205	0	2205	0.00055	2205
LSC	CDS	21	psaA	0	2253	0	2253	0.0005	2253
LSC	CDS	22	ycf3	0	507	0	507	0.00052	507
LSC	CDS	23	rps4	0.0011	606	0	606	0	606
LSC	CDS	24	ndhJ	0	477	0	477	0.0003	477
LSC	CDS	25	ndhK	0	849	0	759	0.00128	849
LSC	CDS	26	ndhC	0	363	0	363	0.00112	363
LSC	CDS	27	atpE	0	402	0	402	0.00142	402
LSC	CDS	28	atpB	0	1497	0	1497	0.00094	1497
LSC	CDS	29	rbcL	0	1428	0	1428	0.00109	1428
LSC	CDS	30	accD	0.00089	1491	0	1542	0.00207	1548
LSC	CDS	31	psaI	0	111	0	111	0	111
LSC	CDS	32	ycf4	0.0012	555	0	555	0.00125	555
LSC	CDS	33	cemA	0	696	0	696	0.00041	696
LSC	CDS	34	petA	0	963	0	963	0.00015	963
LSC	CDS	35	psbJ	0	123	0	123	0.00116	123
LSC	CDS	36	psbL	0	117	0	117	0.00122	117
LSC	CDS	37	psbF	0	120	0	120	0	120
LSC	CDS	38	psbE	0	252	0	252	0	252
LSC	CDS	39	petL	0	96	0	96	0	96
LSC	CDS	40	petG	0	114	0	114	0	114
LSC	CDS	41	psaJ	0	135	0	135	0.00195	135
LSC	CDS	42	rpl33	0	201	0	201	0.00383	201
LSC	CDS	43	rps18	0	306	0	306	0.00251	306
LSC	CDS	44	rpl20	0	354	0	354	0.00121	354
LSC	CDS	45	rps12	0	357	0	372	0.00945	372
LSC	CDS	46	clpP	0.00113	588	0	591	0.00114	588
LSC	CDS	47	psbB	0	1527	0	1527	0.00065	1527
LSC	CDS	48	psbT	0	108	0	108	0.00132	117
LSC	CDS	49	psbN	0	132	0	132	0	132
LSC	CDS	50	psbH	0	222	0	222	0.00183	222
LSC	CDS	51	petB	0	648	0	648	0.00282	678
LSC	CDS	52	petD	0	483	0	483	0.00619	534
LSC	CDS	53	rpoA	0.00066	1008	0	1032	0.00154	1032
LSC	CDS	54	rps11	0	417	0	417	0.00103	417
LSC	CDS	55	rpl36	0	114	0	114	0	114
LSC	CDS	56	infA	0	243	0	234	0.00122	234
LSC	CDS	57	rps8	0.00163	408	0	408	0.00312	408
LSC	CDS	58	rpl14	0	369	0	369	0.00149	369
LSC	CDS	59	rpl16	0	408	0	408	0.00299	411
LSC	CDS	60	rps3	0	657	0	657	0.00238	657
LSC	CDS	61	rpl22	0	468	0	468	0.00092	468
LSC	CDS	62	rps19	0	279	0	279	0.00614	285
IR	CDS	63	rpl2	0	825	0	825	0.00035	825
IR	CDS	64	rpl23	0	282	0	282	0	282
IR	CDS	65	ycf2	0	6897	0	6897	0.00041	6897
IR	CDS	66	ndhB	0	1533	0	1533	0	1533
IR	CDS	67	rps7	0	468	0	468	0.00108	468
IR	CDS	68	ycf1	0.00071	5622	0	5628	0.00308	5628
IR	CDS	69	ycf2_2	0	6897	0	6897	0.00045	6898
SSC	CDS	70	ndhF	0.00062	2247	0	2247	0.00241	2280
SSC	CDS	71	rpl32	0	162	0	162	0.00088	162
SSC	CDS	72	ccsA	0	966	0	1056	0.00157	1056
SSC	CDS	73	ndhD	0.00043	1533	0	1515	0.00221	1533
SSC	CDS	74	psaC	0	246	0	246	0	246
SSC	CDS	75	ndhE	0	306	0	303	0	306
SSC	CDS	76	ndhG	0	531	0	573	0.00118	570
SSC	CDS	77	ndhI	0	504	0	504	0.00057	504
SSC	CDS	78	ndhA	0	1092	0	1092	0.00154	1092
SSC	CDS	79	ndhH	0.00056	1182	0	1182	0.0006	1182
SSC	CDS	80	rps15	0.00244	273	0	273	0.00306	273
LSC	Introns	1	rps16_intron	0	856	0	856	0.00183	881
LSC	Introns	2	atpF_intron	0.00093	716	0	716	0.00276	719
LSC	Introns	3	rpoC1_intron	0	741	0	744	0.00174	744
LSC	Introns	4	ycf3_intron	0	737	0	737	0.00125	737
LSC	Introns	5	ycf3_intronII	0	719	0	720	0.0004	723
LSC	Introns	6	trnL-UAA_intron	0.00127	524	0	525	0	527
LSC	Introns	7	trnV-UAC_intron	0.00114	586	0	588	0.00124	589
LSC	Introns	8	clpP_intron	0	596	0	597	0.00306	600
LSC	Introns	9	clpP_intronII	0	797	0	793	0.00036	799
LSC	Introns	10	rpl16_intron	0.00065	1023	0	1022	0.00118	1023
IR	Introns	11	rpl2_intron	0	670	0	670	0	671
IR	Introns	12	ndhB_intron	0	679	0	679	0.00063	679
IRb	Introns	13	trnI-GAU_intron	0	947	0	953	0.0003	953
SSC	Introns	14	ndhA_intron	0.00062	1085	0	1084	0.00145	1100
LSC	IGS	1	trnH-GUG_psbA	0.00175	382	0	383	0.00301	384
LSC	IGS	2	rps16_trnQ-UUG	0	1620	0	1614	0.00185	1620
LSC	IGS	3	trnQ-UUG_psbK	0	333	0	333	0.00175	333
LSC	IGS	4	psbK_psbI	0	403	0	396	0.00204	396
LSC	IGS	5	psbI_trnS-GCU	0	142	0	142	0.00204	144
LSC	IGS	6	trnR-UCU_atpA	0	115	0	113	0.00255	115
LSC	IGS	7	atpA_atpF	0	59	0	59	0	61
LSC	IGS	8	atpF_atpH	0	376	0	376	0.00446	377
LSC	IGS	9	atpH_atpI	0	1103	0	1104	0.02335	1111
LSC	IGS	10	atpI_rps2	0	209	0	209	0.00281	209
LSC	IGS	11	rps2_rpoC2	0	246	0	246	0	247
LSC	IGS	12	rpoC2_rpoC1	0	177	0	165	0.00087	177
LSC	IGS	13	rpoC1_rpoB	0	26	0	5	0	26
LSC	IGS	14	rpoB_trnC-GCA	0	1235	0	1235	0.00143	1241
LSC	IGS	15	trnC-GCA_petN	0	709	0	719	0.00263	719
LSC	IGS	16	petN_psbM	0	1083	0	1082	0.00307	1083
LSC	IGS	17	psbM_trnD-GUC	0	827	0	827	0.00158	834
LSC	IGS	18	trnD-GUC_trnY-GUA	0	112	0	112	0.00128	112
LSC	IGS	19	trnY-GUA_trnE-UUC	0	59	0	59	0	59
LSC	IGS	20	trnE-UUC_trnT-GGU	0	774	0	773	0.03436	787
LSC	IGS	21	trnT-GGU_psbD	0	1522	0	1517	0.00228	1522
LSC	IGS	22	psbC_trnS-UGA	0	233	0	232	0.00123	233
LSC	IGS	23	trnS-UGA_psbZ	0	356	0	354	0.0037	357
LSC	IGS	24	psbZ_trnG-UCC	0	271	0	271	0	276
LSC	IGS	25	trnG-UCC_trnfM-CAU	0	161	0	161	0.00343	164
LSC	IGS	26	trnfM-CAU_rps14	0	153	0	153	0.00193	153
LSC	IGS	27	rps14_psaB	0	123	0	123	0	123
LSC	IGS	28	psaB_psaA	0	25	0	25	0	25
LSC	IGS	29	psaA_ycf3	0.00087	786	0	770	0.00167	790
LSC	IGS	30	ycf3_trnS-GGA	0	848	0	848	0.00213	888
LSC	IGS	31	trnS-GGA_rps4	0	292	0	292	0.00245	292
LSC	IGS	32	rps4_trnT-UGU	0.002	333	0	333	0.00133	339
LSC	IGS	33	trnT-UGU_trnL-UAA	0	999	0	998	0.00213	1004
LSC	IGS	34	trnL-UAA_trnF-GAA	0	372	0	372	0.00078	378
LSC	IGS	35	trnF-GAA_ndhJ	0	667	0	667	0.00267	667
LSC	IGS	36	ndhJ_ndhK	0	105	0	105	0	105
LSC	IGS	37	ndhC_trnV-UAC	0.00377	358	0	355	0.00242	362
LSC	IGS	38	trnV-UAC_trnM-CAU	0	166	0	165	0.00173	166
LSC	IGS	39	trnM-CAU_atpE	0	203	0	203	0.00141	203
LSC	IGS	40	atpB_rbcL	0.00089	751	0	752	0.00269	755
LSC	IGS	41	rbcL_accD	0	577	0	529	0.00213	582
LSC	IGS	42	accD_psaI	0.0027	770	0	741	0.00279	741
LSC	IGS	43	psaI_ycf4	0	420	0	420	0.00131	421
LSC	IGS	44	ycf4_cemA	0.00148	899	0	899	0.00192	899
LSC	IGS	45	cemA_petA	0.00279	239	0	239	0.00127	239
LSC	IGS	46	petA_psbJ	0.00065	1033	0	1035	0.00138	1042
LSC	IGS	47	psbJ_psbL	0	130	0	130	0	149
LSC	IGS	48	psbL_psbF	0	22	0	22	0	22
LSC	IGS	49	psbF_psbE	0	9	0	9	0.01587	9
LSC	IGS	50	psbE_petL	0.00108	1286	0	1292	0.00132	1298
LSC	IGS	51	petL_petG	0	182	0	182	0.00302	182
LSC	IGS	52	petG_trnW-CCA	0	123	0	123	0.00232	123
LSC	IGS	53	trnW-CCA_trnP-UGG	0.00392	170	0	170	0.00776	170
LSC	IGS	54	psaJ_rpl33	0	454	0	454	0.0009	460
LSC	IGS	55	rpl33_rps18	0.00377	177	0	177	0.00083	177
LSC	IGS	56	rps18_rpl20	0	261	0	262	0.00056	262
LSC	IGS	57	rpl20_rps12	0	780	0	780	0.00282	780
LSC	IGS	58	rps12_clpP	0	149	0	149	0.00273	149
LSC	IGS	59	clpP_psbB	0	451	0	452	0.00185	462
LSC	IGS	60	psbB_psbT	0.00368	181	0	181	0.00403	181
LSC	IGS	61	psbT_psbN	0	60	0	55	0.00659	60
LSC	IGS	62	psbN_psbH	0.00654	102	0	102	0.00614	102
LSC	IGS	63	psbH_petB	0	123	0	123	0.01405	865
LSC	IGS	64	petB_petD	0	188	0	188	0	188
LSC	IGS	65	petD_rpoA	0	205	0	205	0.00612	205
LSC	IGS	66	rpoA_rps11	0	65	0	41	0	65
LSC	IGS	67	rps11_rpl36	0	114	0	114	0.00125	114
LSC	IGS	68	rpl36_infA	0.00575	116	0	116	0.00246	116
LSC	IGS	69	infA_rps8	0	121	0	121	0.00572	121
LSC	IGS	70	rps8_rpl14	0	189	0	189	0.0057	190
LSC	IGS	71	rpl14_rpl16	0.00606	111	0	112	0.00275	115
LSC	IGS	72	rpl16_rps3	0	128	0	128	0.00283	128
LSC	IGS	73	rpl22_rps19	0	51	0	51	0	51
IRb	IGS	74	rps19_rpl2	0	60	0	60	0.00265	60
IRb	IGS	75	rpl2_rpl23	0	18	0	18	0	18
IRb	IGS	76	rpl23_trnI-CAU	0	165	0	165	0	165
IRb	IGS	77	trnI-CAU_ycf2	0	88	0	88	0.07718	166
IRb	IGS	78	trnL-CAA_ndhB	0	556	0	556	0.00194	556
IRb	IGS	79	ndhB_rps7	0	325	0	325	0.00044	325
IRb	IGS	80	rps7_rps12	0.0011	604	0	53	0	604
IRb	IGS	81	rps12_trnV-GAC	0.00036	1844	0	1844	0.00072	1851
IRb	IGS	82	trnV-GAC_rrn16	0	227	0	227	0	227
IRb	IGS	83	rrn16_trnI-GAU	0	296	0	295	0.00148	296
IRb	IGS	84	trnI-GAU_trnA-UGC	0	64	0	64	0	64
IRb	IGS	85	trnA-UGC_rrn23	0	152	0	152	0	152
IRb	IGS	86	rrn23_rrn4.5	0	98	0	98	0	100
IRb	IGS	87	rrn4.5_rrn5	0	228	0	220	0.00067	260
IRb	IGS	88	rrn5_trnR-ACG	0	242	0	242	0.00177	254
IRb	IGS	89	trnR-ACG_trnN-GUU	0	595	0	595	0.00079	595
SSC	IGS	90	ndhF_rpl32	0	682	0	679	0.00581	683
SSC	IGS	91	rpl32_trnL-UAG	0	922	0	921	0.00352	925
SSC	IGS	92	ccsA_ndhD	0.0028	238	0	238	0.00617	239
SSC	IGS	93	ndhD_psaC	0	110	0	128	0.0038	128
SSC	IGS	94	psaC_ndhE	0	230	0	230	0.00301	230
SSC	IGS	95	ndhE_ndhG	0	234	0	237	0.00244	237
SSC	IGS	96	ndhG_ndhI	0.00338	394	0	352	0.00084	403
SSC	IGS	97	ndhI_ndhA	0	94	0	94	0.00772	94
SSC	IGS	98	ndhA_ndhH	0	1	0	1	0	1
SSC	IGS	99	ndhH_rps15	0	92	0	92	0.00155	92
SSC	IGS	100	rps15_ycf1	0	382	0	382	0.00365	382
IRa	IGS	101	ycf1_trnN-GUU	0	312	0	312	0.00053	312
IRa	IGS	102	trnN-GUU_trnR-ACG	0	595	0	595	0.00089	595
IRa	IGS	103	trnR-ACG_rrn5	0	242	0	242	0.00177	254
IRa	IGS	104	rrn5_rrn4.5	0	228	0	220	0	260
IRa	IGS	105	rrn4.5_rrn23	0	98	0	98	0	100
IRa	IGS	106	rrn23_trnA-UGC	0	152	0	152	0	152
IRa	IGS	107	trnA-UGC_trnI-GAU	0	64	0	64	0	64
IRa	IGS	108	trnI-GAU_rrn16	0	297	0	295	0.0764	296
IRa	IGS	109	rrn16_trnV-GAC	0	228	0	227	0	229
IRa	IGS	110	trnV-GAC_rps12	0.00182	1845	0	1844	0.00104	1852
IRa	IGS	111	rps12_rps7	0.0011	604	0	53	0	604
IRa	IGS	112	rps7_ndhB	0	325	0	325	0.00044	325
IRa	IGS	113	ndhB_trnL-CAA	0	555	0	556	0.00204	556
IRa	IGS	114	ycf2_trnI-CAU	0	88	0	88	0	89
IRa	IGS	115	trnI-CAU_rpl23	0	166	0	165	0.08485	295
IRa	IGS	116	rpl23_rpl2	0	18	0	18	0	18
IRa	IGS	117	rpl2_trnH-GUG	0	107	0	107	0.00403	113
