# Supplementary material for: Exploring the evolutionary characteristics between cultivated tea and its wild relatives using complete chloroplast genomes
Source: Research Square preprint supplement (doi:10.21203/rs.3.rs-15441/v3), 2020-10-15
Supplement: Supplementary file 3 [file fa309c45e5625cf62471f9a9.xlsx]

## Sheet: Sheet1
Table S6. Positive selection sites identified among 16 genes with synonymous or nonsynonymous mutations
Genes	Model	Null	Positive	df	lnL 2*|(HA-H0)|	No. of Sites (BEB)	Putative Sites under Positive Selection
matK	M1 vs. M2	-1952.19	-1951.46	2	1.44713	0
	M7 vs. M8	-1952.19	-1951.46	2	1.44712	0
rps16	M1 vs. M2	-344.432	-344.292	2	0.279082	0
	M7 vs. M8	-344.432	-344.257	2	0.34935	0
rpoC2	M1 vs. M2	-5472.66	-5471.76	2	1.80419	0
	M7 vs. M8	-5472.66	-5471.71	2	1.89653	0
rpoB	M1 vs. M2	-4244.55	-4244.55	2	0	0
	M7 vs. M8	-4244.55	-4244.55	2	0.00016	0
psbC	M1 vs. M2	-1895.92	-1895.92	2	-0.008782	0
	M7 vs. M8	-1895.92	-1895.92	2	-4.6e-05	0
rps4	M1 vs. M2	-798.228	-798.228	2	5e-05	0
	M7 vs. M8	-798.228	-798.228	2	0.000284	0
accD	M1 vs. M2	-1936.87	-1936.3	2	1.14932	0
	M7 vs. M8	-1936.87	-1936.3	2	1.15297	0
ycf4	M1 vs. M2	-732.485	-732.485	2	0.000114	0
	M7 vs. M8	-732.485	-732.485	2	-0.000298	0
clpP	M1 vs. M2	-771.966	-771.771	2	0.38989	0
	M7 vs. M8	-771.966	-771.771	2	0.389888	0
rpoA	M1 vs. M2	-1307.48	-1307.48	2	5.8e-05	0
	M7 vs. M8	-1307.48	-1307.48	2	-5.8e-05	0
rps8	M1 vs. M2	-533.625	-533.402	2	0.44541	0
	M7 vs. M8	-533.625	-533.402	2	0.44541	0
ycf1	M1 vs. M2	-7160.57	-7159.52	2	2.09828	0
	M7 vs. M8	-7160.57	-7159.53	2	2.07844	6	275 P/Q/Q, 345 L/F/L, 718 L/L/F, 1173 M/I/M, 1174 N/H/N, 1233 L/F/L
ndhF	M1 vs. M2	-2859.09	-2859.09	2	7e-05	0
	M7 vs. M8	-2859.09	-2859.09	2	-7.2e-05	0
ndhD	M1 vs. M2	-1989	-1988.82	2	0.349912	0
	M7 vs. M8	-1989	-1988.82	2	0.352832	0
ndhH	M1 vs. M2	-1544.11	-1543.96	2	0.30026	0
	M7 vs. M8	-1544.11	-1543.96	2	0.302948	0
rps15	M1 vs. M2	-351.776	-351.647	2	0.258084	0
	M7 vs. M8	-351.776	-351.631	2	0.28908	1	18 T/N/N
